# Supplementary material
Source: PubMed Central journal article supplement (PMC6934407)

# supplementary Figure 1

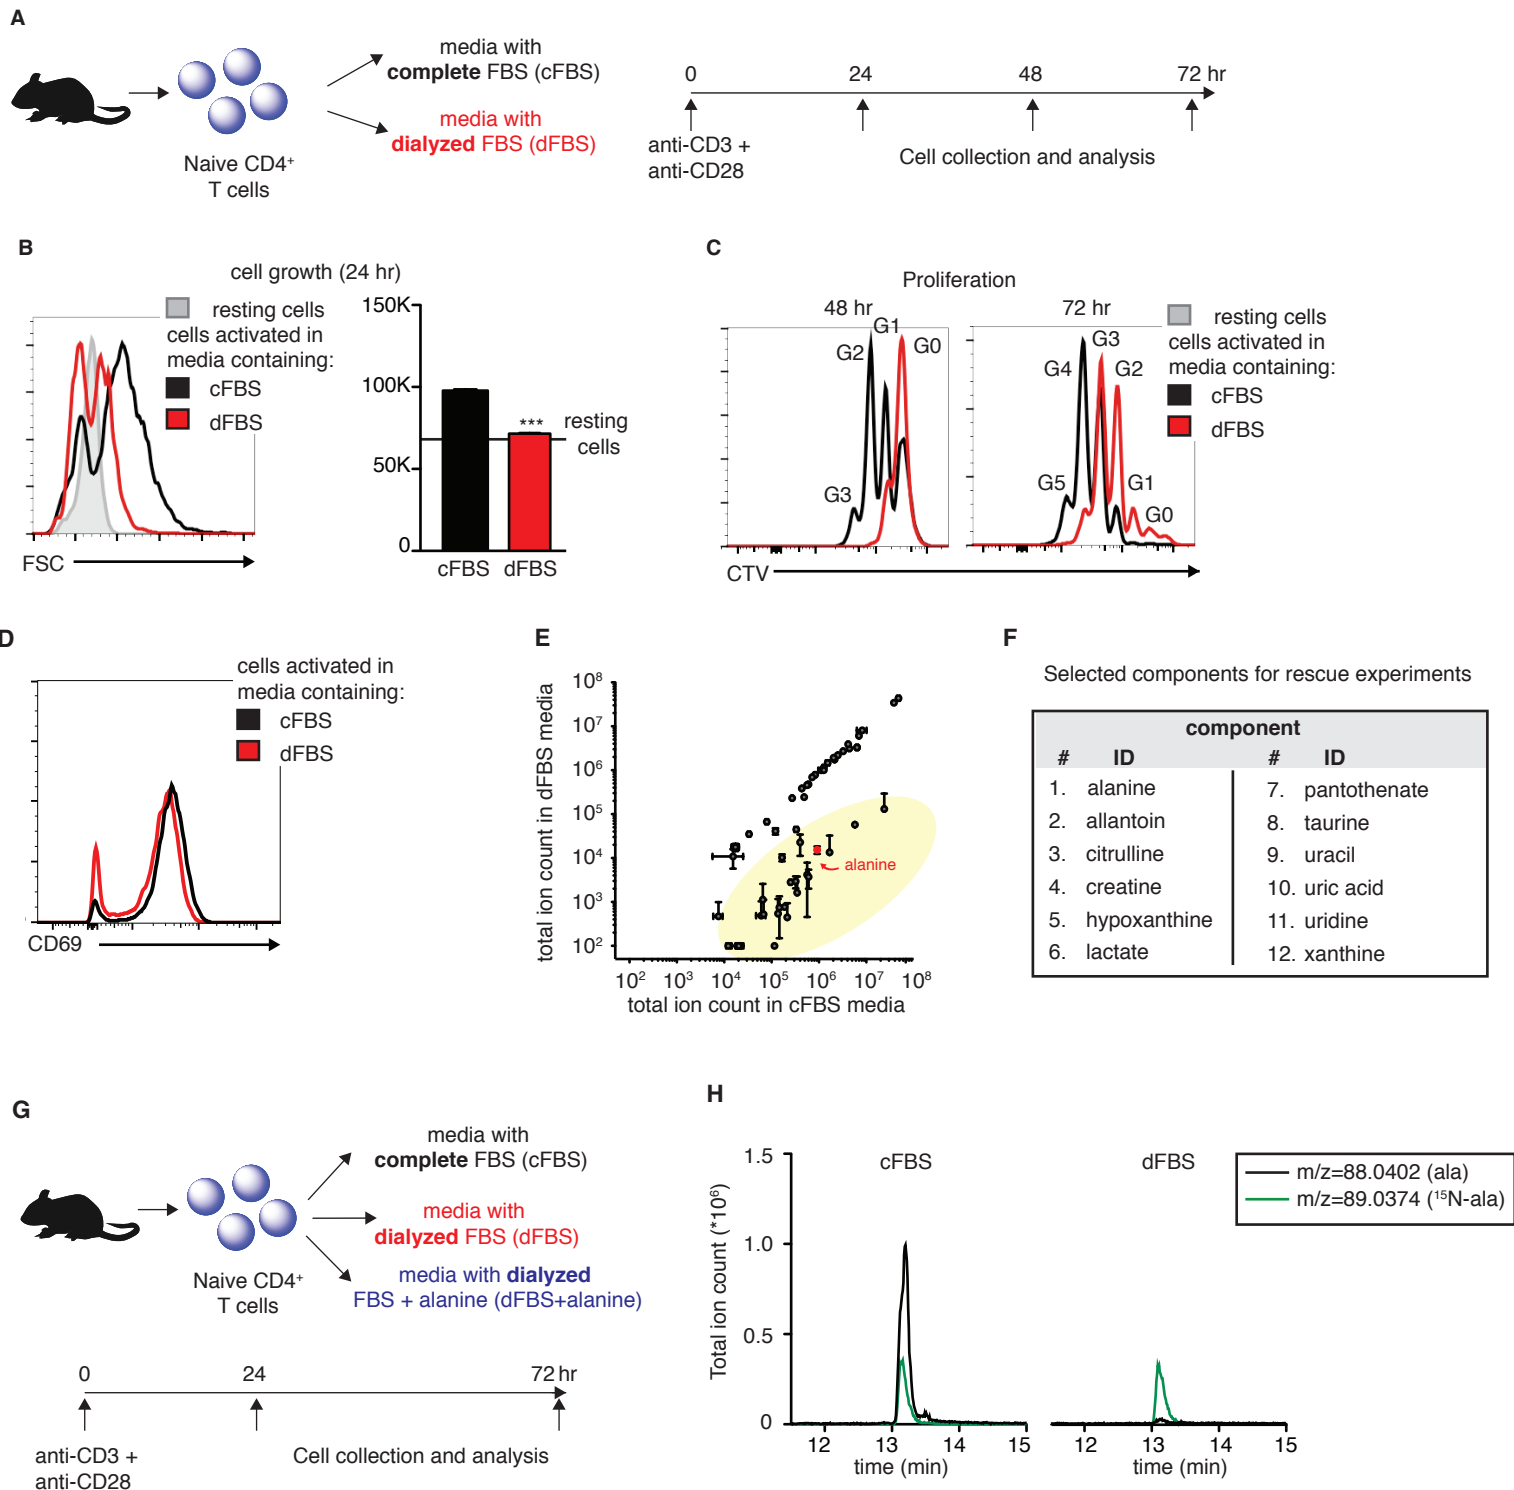

Supplement: NIHMS1057433-supplement-S__Figure_1.pdf [file NIHMS1057433-supplement-S__Figure_1.pdf]

## Supplementary Figure 2

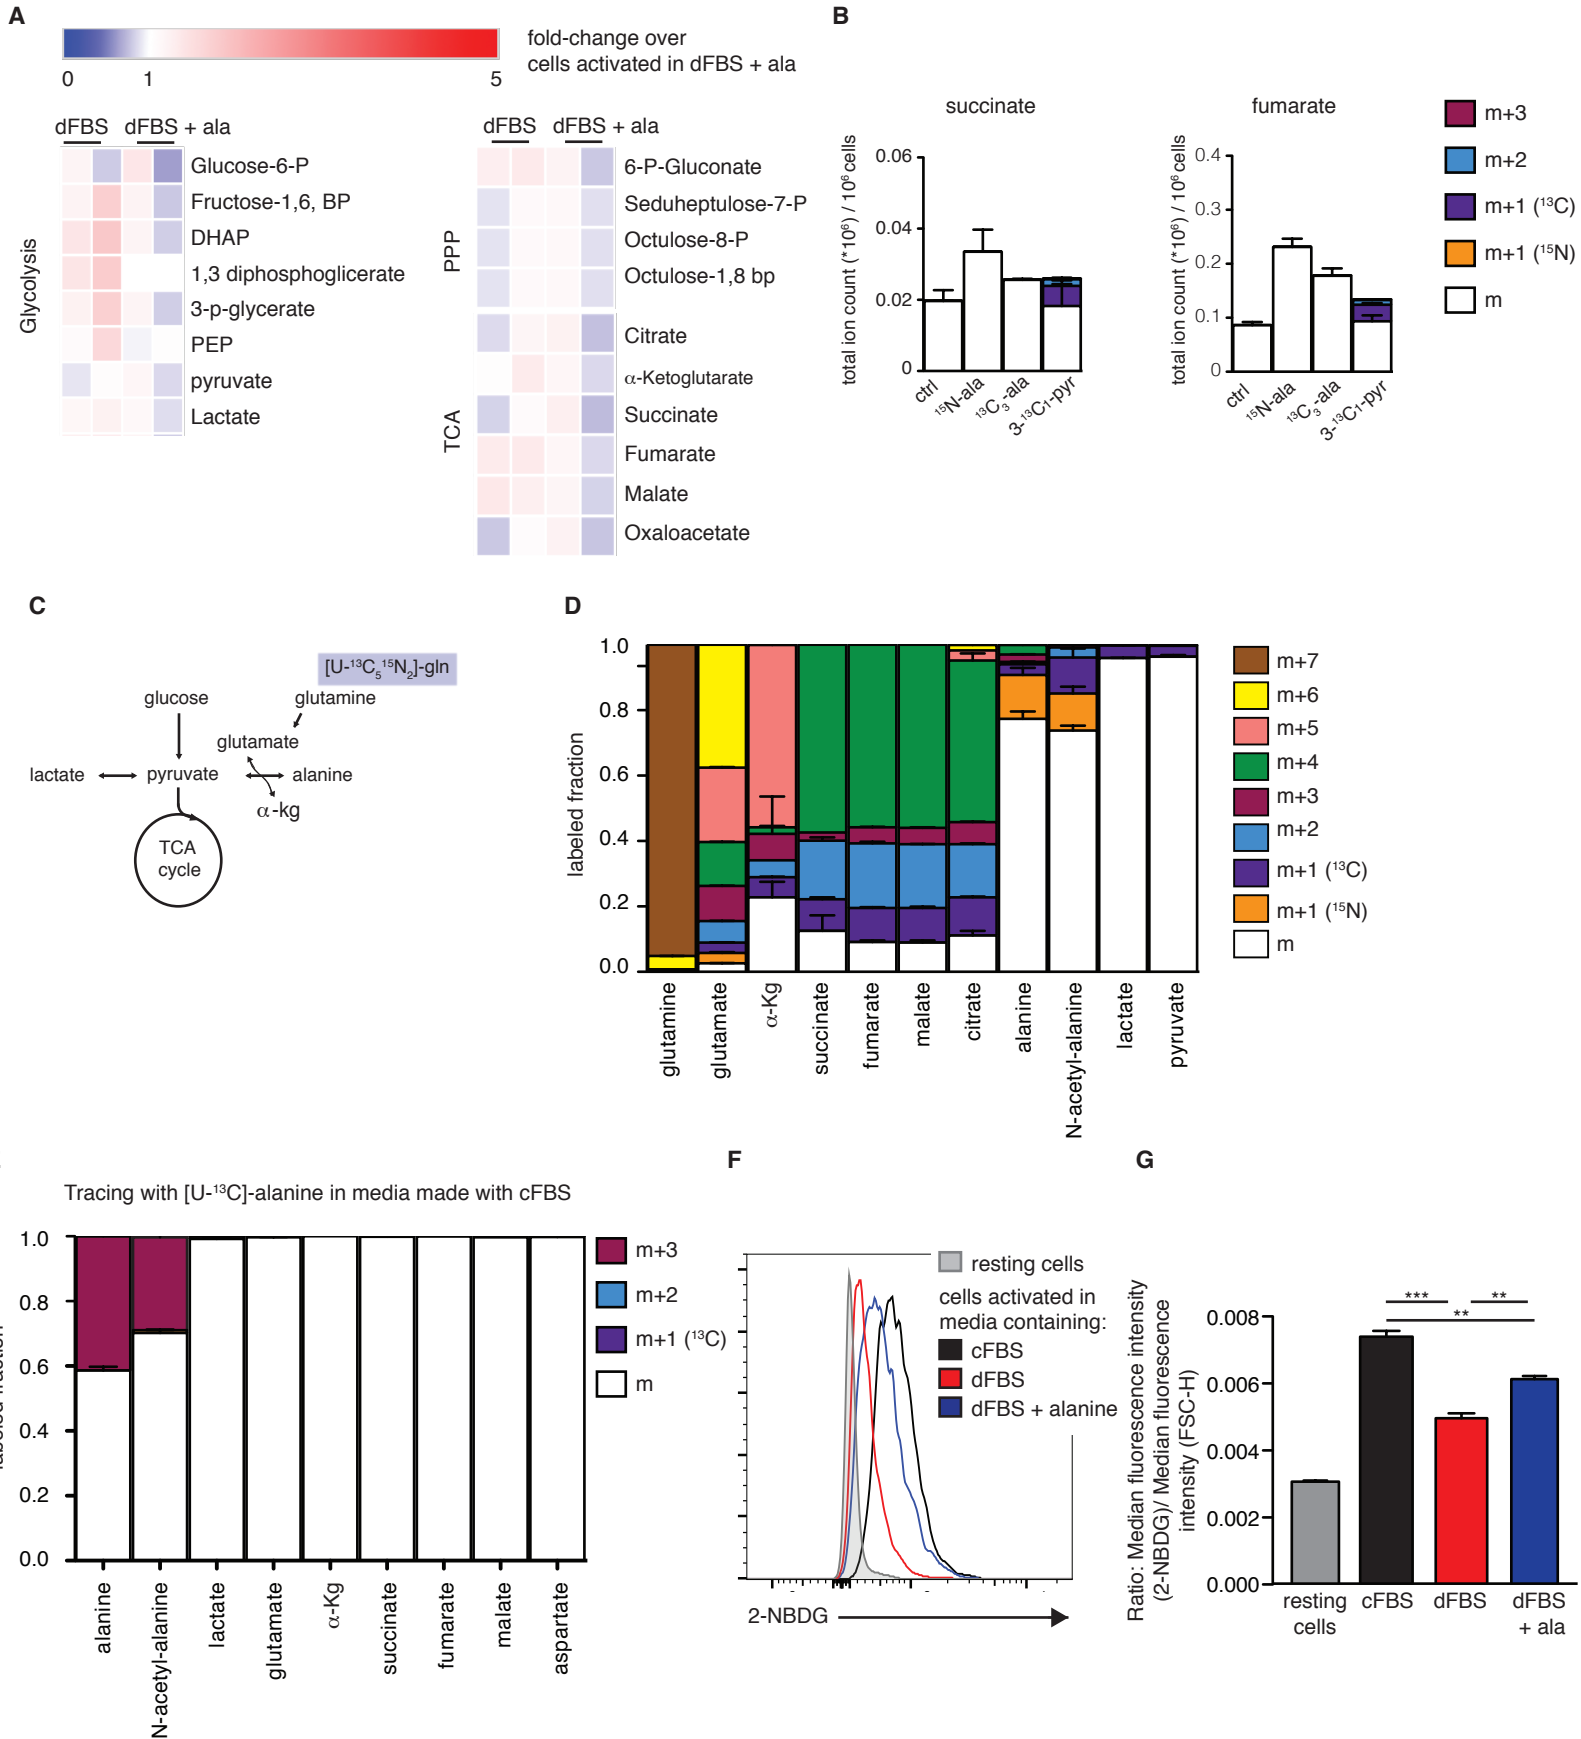

Supplement: NIHMS1057433-supplement-S__Figure_2.pdf [file NIHMS1057433-supplement-S__Figure_2.pdf]

### Supplementary Figure 3

**A**

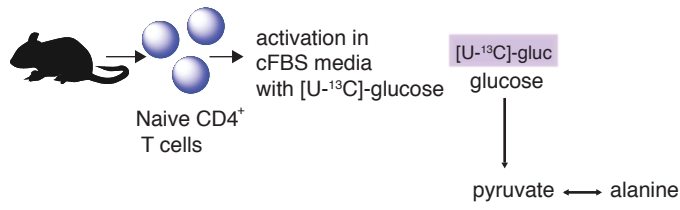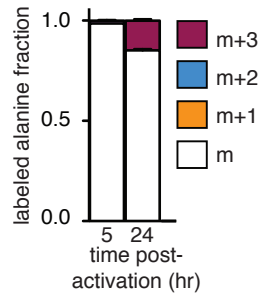

**B**

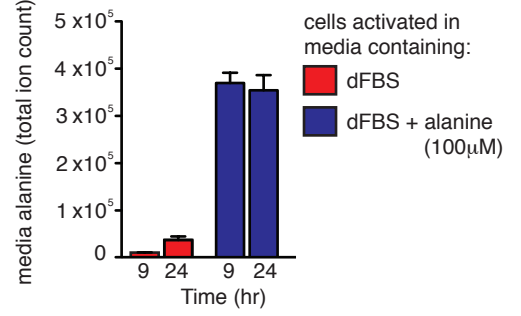

**C**

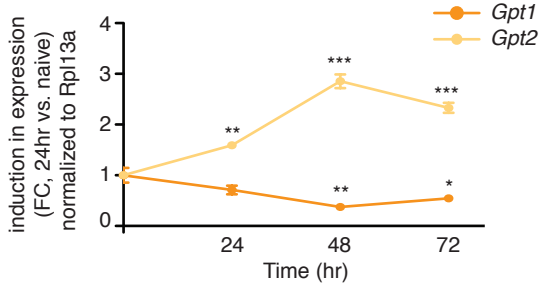

**D**

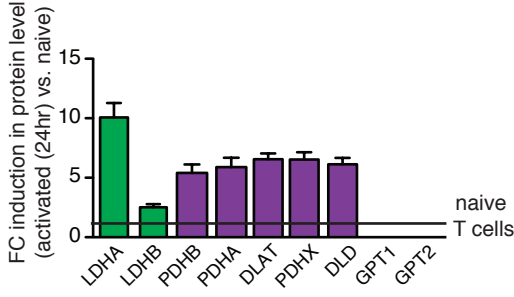

**E**

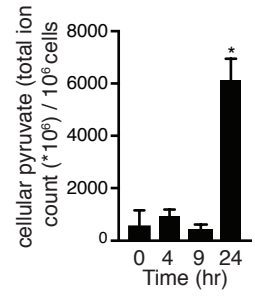

**F**

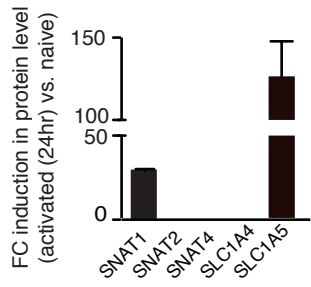

**G**

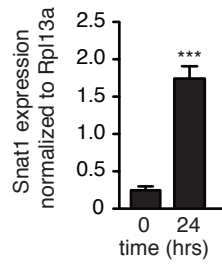

**H**

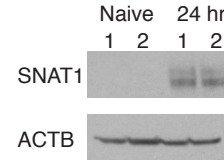

**I**

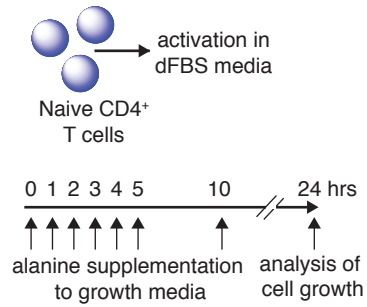

**J**

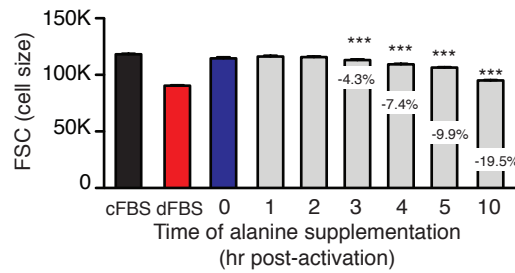

Supplement: NIHMS1057433-supplement-S__Figure_3.pdf [file NIHMS1057433-supplement-S__Figure_3.pdf]

# Supplementary Figure 4

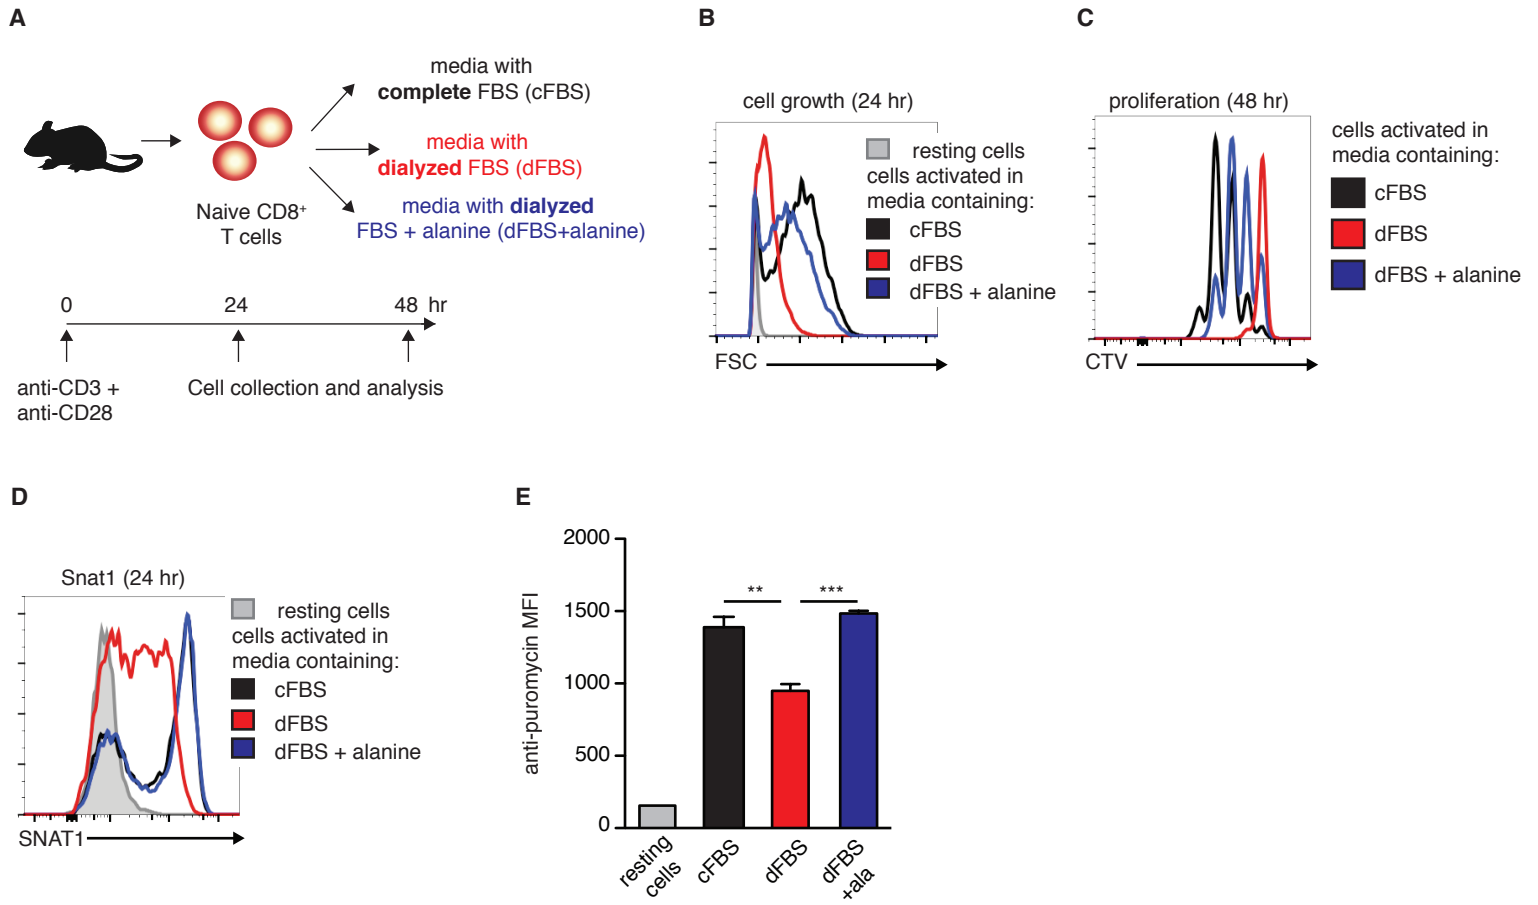

Supplement: NIHMS1057433-supplement-S__Figure_4.pdf [file NIHMS1057433-supplement-S__Figure_4.pdf]

# Supplementary Figure 5

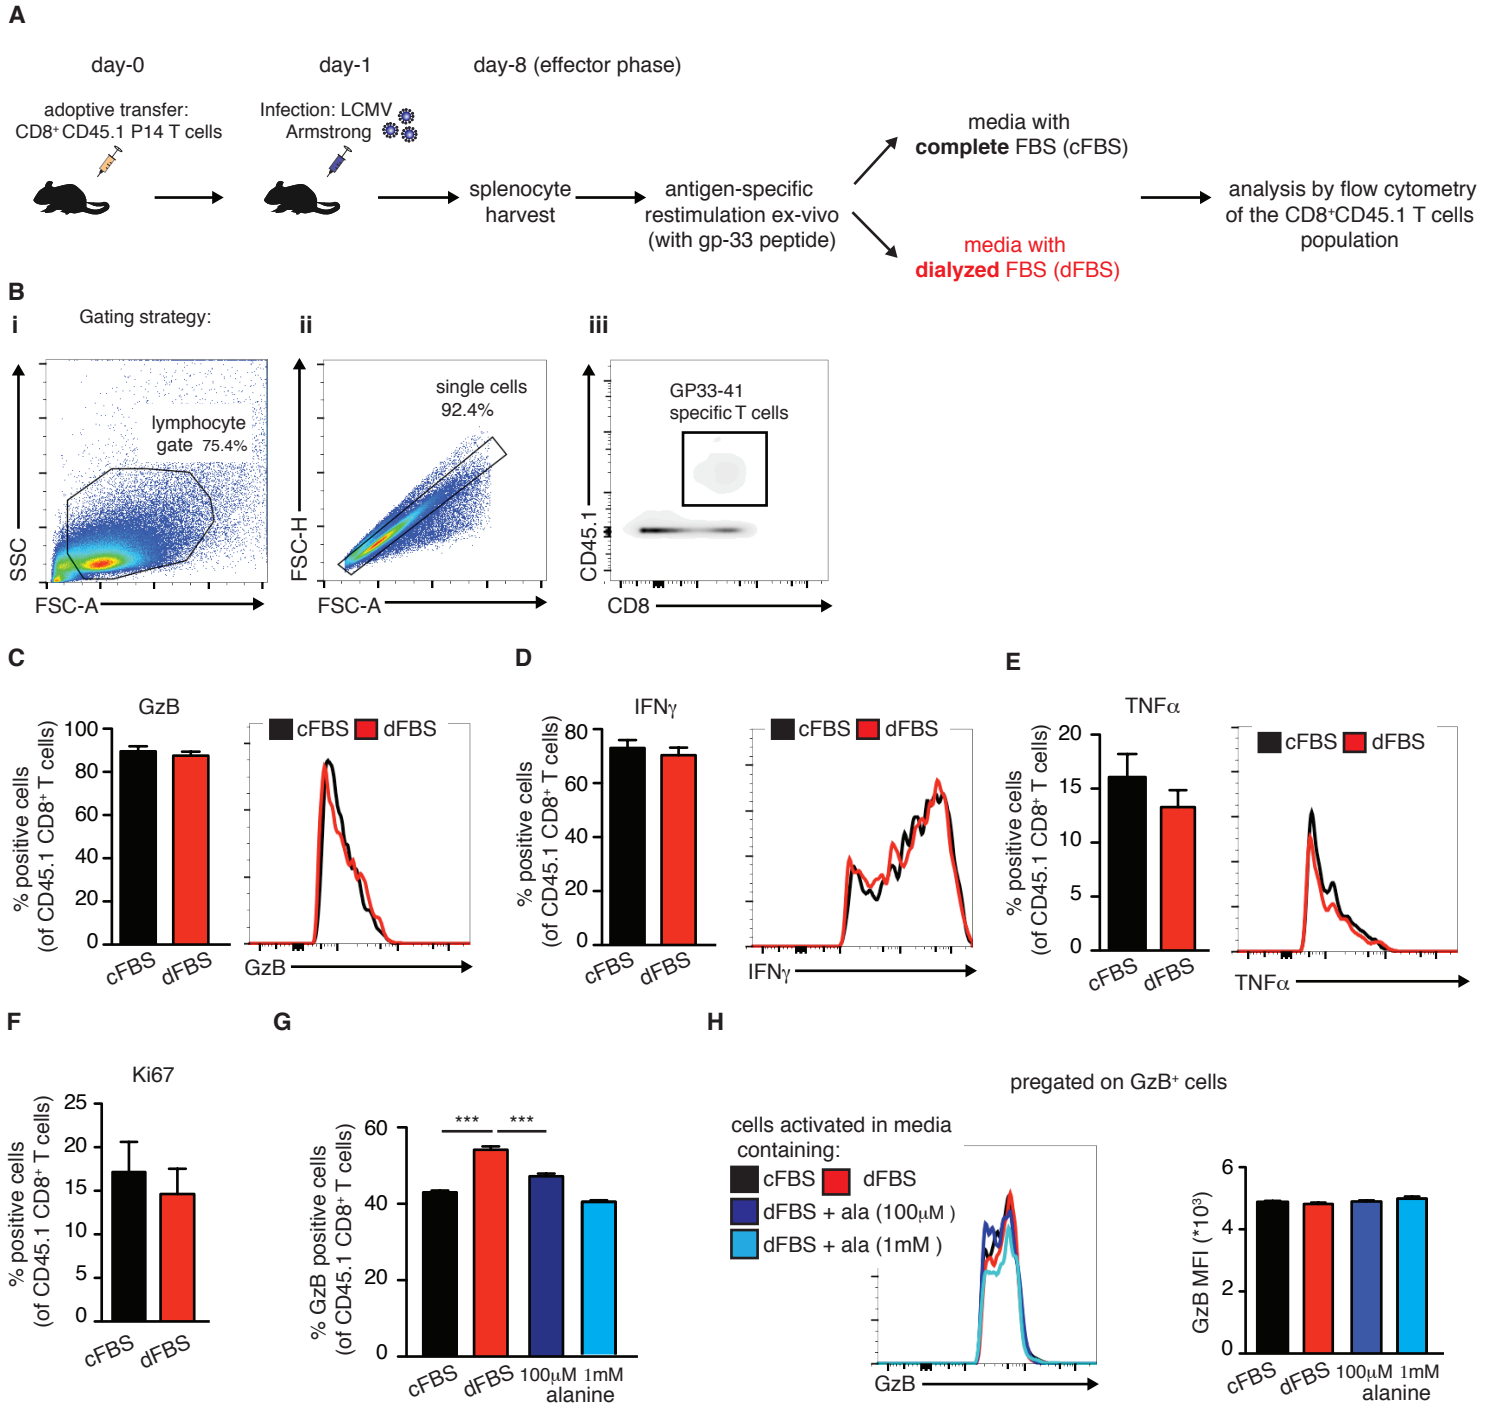

Supplement: NIHMS1057433-supplement-S__Figure_5.pdf [file NIHMS1057433-supplement-S__Figure_5.pdf]
